# Supplementary material for: Racial Disparities in Periprosthetic Joint Infections after Primary Total Joint Arthroplasty: A Retrospective Study
Source: MDPI journal article supplement (doi:10.3390/antibiotics12111629), 2023-11-16
Supplement: s1 [file s1]

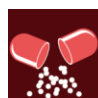

## Supplementary Material

**Table S1.** Current Procedural Terminology (CPT®) and International Classification of Diseases, Tenth Revision (ICD-10) codes.

|              | Procedure or Diagnosis                                                    |
|--------------|---------------------------------------------------------------------------|
| CPT codes    |                                                                           |
| 27130        | Primary total hip arthroplasty                                            |
| 27447        | Primary total knee arthroplasty                                           |
| ICD-10 codes |                                                                           |
| T84.5        | Infection and inflammatory reaction due to internal joint prosthesis      |
| T84.51       | Infection and inflammatory reaction due to internal right hip prosthesis  |
| T84.52       | Infection and inflammatory reaction due to internal left hip prosthesis   |
| T84.53       | Infection and inflammatory reaction due to internal right knee prosthesis |
| T84.54       | Infection and inflammatory reaction due to internal left knee prosthesis  |

**Table S2.** Baseline characteristics by race and sex intersection groups.

| Characteristic                                 | NH White<br>Male<br>(N = 4562)<br>no. (%) | NH White<br>Female<br>(N = 5102)<br>no. (%) | NH Black<br>Male<br>(N = 128)<br>no. (%) | NH Black<br>Female<br>(N = 226)<br>no. (%) |
|------------------------------------------------|-------------------------------------------|---------------------------------------------|------------------------------------------|--------------------------------------------|
| Age – years, mean ( $\pm$ SD)                  | 68 ( $\pm$ 10)                            | 70 ( $\pm$ 10)                              | 62 ( $\pm$ 11)                           | 67 ( $\pm$ 11)                             |
| Median Household Income† – mean<br>( $\pm$ SD) | 108,891 ( $\pm$ 39,776)                   | 106,843 ( $\pm$ 39,001)                     | 83,687<br>( $\pm$ 31,619)                | 82,193<br>( $\pm$ 31,883)                  |
| Type of TJA*                                   |                                           |                                             |                                          |                                            |
| TKA*                                           | 2363 (51.8)                               | 2852 (55.9)                                 | 58 (45.3)                                | 135 (59.7)                                 |
| THA*                                           | 2199 (48.2)                               | 2250 (44.1)                                 | 70 (54.7)                                | 91 (40.3)                                  |
| Comorbidities                                  |                                           |                                             |                                          |                                            |
| Obesity                                        | 1253 (27.9)                               | 1541 (30.2)                                 | 42 (32.8)                                | 126 (55.8)                                 |
| Hypertension, uncomplicated                    | 2978 (65.3)                               | 3088 (60.5)                                 | 95 (74.2)                                | 184 (81.4)                                 |
| Hypertension, complicated                      | 594 (13.0)                                | 559 (11.0)                                  | 26 (20.3)                                | 59 (26.1)                                  |
| Chronic pulmonary disease                      | 903 (19.8)                                | 1352 (26.5)                                 | 33 (25.8)                                | 87 (38.5)                                  |
| Diabetes, uncomplicated                        | 718 (15.7)                                | 613 (12.0)                                  | 36 (28.1)                                | 78 (34.5)                                  |
| Diabetes, complicated                          | 482 (10.6)                                | 372 (7.3)                                   | 27 (21.1)                                | 46 (20.4)                                  |
| Renal failure                                  | 531 (11.6)                                | 509 (10.9)                                  | 27 (21.1)                                | 31 (13.7)                                  |
| Liver disease                                  | 474 (10.4)                                | 541 (10.6)                                  | 21 (16.4)                                | 38 (16.8)                                  |
| HIV/AIDS                                       | 17 (0.4)                                  | 4 (0.1)                                     | 2 (1.6)                                  | 1 (0.4)                                    |
| Metastatic cancer                              | 260 (5.7)                                 | 280 (5.5)                                   | 4 (3.1)                                  | 9 (4.0)                                    |
| Rheumatological disorders                      | 456 (10.0)                                | 805 (15.8)                                  | 13 (10.2)                                | 57 (25.2)                                  |
| Blood loss anemia                              | 116 (2.5)                                 | 156 (3.1)                                   | 8 (6.3)                                  | 18 (8.0)                                   |
| Deficiency anemia                              | 351 (7.7)                                 | 480 (9.4)                                   | 12 (9.4)                                 | 49 (21.7)                                  |
| Alcohol abuse                                  | 322 (7.1)                                 | 184 (3.6)                                   | 13 (10.2)                                | 11 (4.9)                                   |
| Drug abuse                                     | 322 (7.1)                                 | 263 (5.2)                                   | 22 (17.2)                                | 22 (9.7)                                   |
| Psychoses                                      | 28 (0.6)                                  | 53 (1.0)                                    | 3 (2.3)                                  | 5 (2.2)                                    |
| Depression                                     | 882 (19.3)                                | 1,700 (33.3)                                | 29 (22.7)                                | 89 (39.4)                                  |
| ECI* – mean ( $\pm$ SD)                        | 18.2 ( $\pm$ 23.6)                        | 18.3 ( $\pm$ 21.6)                          | 25.9 ( $\pm$ 28.3)                       | 28.4 ( $\pm$ 26.1)                         |

\*Abbreviations: NH—non-Hispanic; TJA—Total Joint Arthroplasty; THA—Total Hip Arthroplasty; TKA—Total Knee Arthroplasty; ECI—Elixhauser Comorbidity Index. † Median household income was calculated using Zip Code data.

**Table S3.** Bivariate associations between variables and PJI.

| Variable             | PJI                                 |                 |
|----------------------|-------------------------------------|-----------------|
|                      | Cumulative Incidence Ratio (95% CI) | <i>p</i> -value |
| Type of Arthroplasty |                                     | <0.0001         |
| Hip Arthroplasty     | Ref                                 |                 |
| Knee Arthroplasty    | 17.26 (8.50–35.07)                  |                 |
| Obesity              |                                     | 0.0092          |
| No obesity           | Ref                                 |                 |
| Obese                | 1.51 (1.09–1.08)                    |                 |
| Diabetes             |                                     | 0.0115          |
| No diabetes          | Ref                                 |                 |
| Diabetes             | 1.59 (1.11–2.23)                    |                 |
| Substance abuse      |                                     | <0.0001         |
| No substance abuse   | Ref                                 |                 |
| Substance abuse      | 2.45 (1.61–3.74)                    |                 |

\*Abbreviations: PJI—periprosthetic joint infection.

**Table S4.** Baseline characteristics in individuals with and without PJI, stratified by race.

| Characteristic                              | NH White                |                         | NH Black               |                        |
|---------------------------------------------|-------------------------|-------------------------|------------------------|------------------------|
|                                             | PJI                     | No PJI                  | PJI                    | No PJI                 |
|                                             | (N = 159)<br>no. (%)    | (N = 9505)<br>no. (%)   | (N = 11)<br>no. (%)    | (N = 343)<br>no. (%)   |
| Age – years, mean ( $\pm$ SD)               | 70 ( $\pm$ 10)          | 69 ( $\pm$ 10)          | 67 ( $\pm$ 9)          | 65 ( $\pm$ 12)         |
| Sex – no. (%)                               |                         |                         |                        |                        |
| Female                                      | 61 (38.4)               | 5041 (53.0)             | 6 (54.5)               | 220 (64.1)             |
| Male                                        | 98 (61.6)               | 4464 (47.0)             | 5 (45.5)               | 123 (35.9)             |
| Median Household Income† – mean ( $\pm$ SD) | 103,762 ( $\pm$ 38,056) | 107,877 ( $\pm$ 39,400) | 85,894 ( $\pm$ 42,967) | 82,633 ( $\pm$ 31,366) |
| Type of TJA*                                |                         |                         |                        |                        |
| TKA*                                        | 151 (95.0)              | 5064 (53.3)             | 11 (100.0)             | 102 (53.1)             |
| THA*                                        | 8 (5.0)                 | 4441 (46.7)             | 0 (100.0)              | 0 (0.0)                |
| Comorbidities                               |                         |                         |                        |                        |
| Obesity                                     | 60 (37.7)               | 2754 (29.0)             | 6 (54.5)               | 162 (47.2)             |
| Hypertension, uncomplicated                 | 117 (73.6)              | 5949 (62.6)             | 11 (100.0)             | 268 (78.1)             |
| Hypertension, complicated                   | 43 (27.0)               | 1110 (11.7)             | 3 (27.3)               | 82 (23.)               |
| Chronic pulmonary disease                   | 54 (34.0)               | 2201 (23.2)             | 3 (27.3)               | 117 (34.1)             |
| Diabetes, uncomplicated                     | 33 (20.8)               | 1298 (13.7)             | 3 (27.3)               | 111 (32.4)             |
| Diabetes, complicated                       | 25 (15.7)               | 829 (8.7)               | 2 (18.2)               | 71 (20.7)              |
| Renal failure                               | 28 (17.6)               | 1012 (10.6)             | 4 (36.4)               | 75 (21.9)              |
| Liver disease                               | 27 (17.0)               | 988 (10.4)              | 4 (36.4)               | 55 (16.0)              |
| HIV/AIDS                                    | 0 (0.0)                 | 21 (0.2)                | 0 (0.0)                | 3 (0.9)                |
| Metastatic cancer                           | 11 (6.9)                | 529 (5.6)               | 2 (18.2)               | 11 (3.2)               |
| Rheumatological disorders                   | 29 (18.2)               | 1232 (13.0)             | 1 (9.1)                | 69 (20.1)              |
| Blood loss anemia                           | 6 (3.8)                 | 266 (2.8)               | 2 (18.2)               | 24 (7.0)               |
| Deficiency anemia                           | 26 (16.4)               | 805 (8.5)               | 4 (36.4)               | 57 (16.6)              |
| Alcohol abuse                               | 18 (11.3)               | 488 (5.1)               | 1 (9.1)                | 23 (6.7)               |
| Drug abuse                                  | 21 (13.2)               | 564 (5.6)               | 3 (27.3)               | 41 (12.0)              |
| Psychoses                                   | 1 (0.6)                 | 80 (0.8)                | 1 (9.1)                | 7 (2.0)                |
| Depression                                  | 59 (37.1)               | 2523 (26.5)             | 6 (54.5)               | 112 (32.7)             |
| ECI* – mean ( $\pm$ SD)                     | 32.1 ( $\pm$ 29.2)      | 18.0 ( $\pm$ 22.4)      | 48.3 ( $\pm$ 42.6)     | 26.8 ( $\pm$ 26.1)     |

\*Abbreviations: TJA—Total Joint Arthroplasty; THA—Total Hip Arthroplasty; TKA—Total Knee Arthroplasty. † Median household income was calculated using Zip Code data.

**Table S5.** Comparison of Poisson regression models comparing the incidence of PJI between non-Hispanic White and non-Hispanic Black individuals using non-Hispanic White individuals as the reference group.

| Model                                                         | Cumulative Incidence Ratio (95% CI) | p-value |
|---------------------------------------------------------------|-------------------------------------|---------|
| Model 1: Unadjusted                                           | 1.89 (1.04, 3.44)                   | 0.0381  |
| Model 2: Adjusted for age and sex                             | 2.12 (1.16, 3.89)                   | 0.0150  |
| Model 3: Adjusted for age, sex and comorbidities (ECI* score) | 1.65 (0.90, 3.03)                   | 0.1036  |

\*Abbreviations: ECI—Elixhauser Comorbidity Index.
